# Supplementary material
Source: PubMed Central journal article supplement (PMC3502645)
Supplement: NIHMS419269-supplement-1_si_001.pdf [file NIHMS419269-supplement-1_si_001.pdf]

DS5  
Standard

COMPOUND TABLE

|              |                                 | channel     | RT   | NG/ML(10-3)<br>ul in 1L |
|--------------|---------------------------------|-------------|------|-------------------------|
| ASC          | Ascorbic Acid                   | 3&4         | 7.2  | 15000                   |
| URIC         | Uric acid                       | 4           | 11.6 | 10000                   |
| CYS          | Cysteine                        | 14          | 11.7 | 400                     |
| XAN          | Xanthine                        | 11 or<br>12 | 14.4 | 200                     |
| HX           | Hypoxanthine                    | 16          | 17.0 | 400                     |
| VMA          | Vanillylmandelic Acid           | 7           | 18.9 | 100                     |
| GSH          | Glutathione(reduced)            | 13-16       | 22.4 | 500                     |
| Xanth        | Xanthosine                      | 14          | 25.9 | 200                     |
| MHPG         | Methoxy-Hydroxyphenly<br>Glycol | 7           | 24.6 | 30                      |
| HGA          | Homogentisic Acid               | 1           | 26.7 | 30                      |
| 7MXAN        | 7-Methylxanthine                | 15-16       | 27.1 | 150                     |
| MET          | Methionine                      | 15          | 31.1 | 500                     |
| NE           | Norepinephrine                  | 3           | 29.9 | 30                      |
| GR           | Guanosine                       | 13/14       | 28.8 | 200                     |
| LD           | L-Dopa                          | 3           | 30.4 | 50                      |
| GSSG         | Glutathione(oxidized )          | 16          | 27.9 | 400                     |
| G            | Guanine                         | 10 or<br>11 | 31.8 | 250                     |
| 3OHKY        | 3-Hydroxykynurenine             | 3           | 35.0 | 30                      |
| EPI          | Epinephrine                     | 3           | 34.5 | 50                      |
| TYR          | Tyrosine                        | 12          | 35.6 | 5000                    |
| DOPAC        | Dihydroxyphenylacetic Acid      | 2 or 3      | 37.9 | 60                      |
| 4HPLA        | 4-Hydroxyphenyllactic acid      | 10          | 38.9 | 400                     |
| 3OHAN        | 3-Hydroxyanthranilic Acid       | 3           | 41.1 | 30                      |
| paraxanthine | 1,7-diMethylxanthine            | 14-16       | 39.8 | 100                     |
| 5HTP         | 5-Hydroxytrptophan              | 4           | 41.9 | 50                      |

|              |                                 |       |       |             |
|--------------|---------------------------------|-------|-------|-------------|
| theophylline | 1,3-diMethylxanthine            | 14-16 | 41.7  | <b>150</b>  |
| 4HBAC        | 4-Hydroxybenzoic acid           | 13    | 44.9  | <b>200</b>  |
| 3OMD         | 3-o-Methyldopa                  | 7     | 40.2  | <b>50</b>   |
| 5HIAA        | 5-Hydroxyindoleacetic acid      | 4     | 45.2  | <b>60</b>   |
| KYN          | Kynureinine                     | 13    | 45.9  | <b>400</b>  |
| NMN          | Normetanephrine                 | 7     | 42.7  | <b>50</b>   |
| DA           | Dopamine                        | 3     | 46.3  | <b>50</b>   |
| MN           | Metanephrin                     | 7     | 46.1  | <b>50</b>   |
| NA5HT        | Acetylserotonin (N)             | 3     | 47.1  | <b>50</b>   |
| HVA          | Homovanillic Acid               | 7     | 52.7  | <b>60</b>   |
| 4HPAC        | 4-Hydroxyphenylacetic acid      | 10    | 48.5  | <b>200</b>  |
| TYRA         | Tryamine                        | 11    | 52.3  | <b>1000</b> |
| 2HPAC        | 2-Hydroxyphenylacetic Acid      | 12    | 55.7  | <b>200</b>  |
| 5HT          | 5-Serotonin                     | 4     | 54.9  | <b>50</b>   |
| 3MT          | 3-Methoxytyramine               | 7     | 55.1  | <b>30</b>   |
| NM5HT        | Methyserotonin (N)              | 4     | 55.7  | <b>50</b>   |
| TRP          | Tryptophan                      | 12    | 56.2  | <b>5000</b> |
| MEL          | Melatonin                       | 10    | 65.8  | <b>300</b>  |
| TPOL         | Tryptophol                      | 12    | 67.9  | <b>200</b>  |
| I3AA         | Indole-3-acetic acid            | 9     | 68.2  | <b>300</b>  |
| I3PA         | Indole-3-propionic acid         | 9     | 71.8  | <b>200</b>  |
| d toco       | (+)- $\gamma$ -Tocopherol       |       | 101   | <b>150</b>  |
| g toco       | (+)- $\delta$ -Tocopherol       |       | 102.9 | <b>200</b>  |
| a toco       | ( $\pm$ )- $\alpha$ -Tocopherol |       | 104.5 | <b>250</b>  |

The oxidation potential of each metabolite relates to the observed channels, which are held between 0 and 900 mV at 60 mV increments.

### **LC-EC Profiling Method<sup>12</sup>:**

Separation was performed by gradient elution on two reversed-phase C<sub>18</sub> META 250 x 4.6, 5 $\mu$ m columns (Thermo Scientific ) connected in tandem with PEEK tubing. The column temperature was held at 32 °C and the conditions were as follows:

|                |                                |
|----------------|--------------------------------|
| 1. 1.00 min    | 0%B at 1.0 ml/min : start file |
| 2. 30.00 min   | 12%B at 1.0 ml/min             |
| 3. 35.00 min   | 35%B at 1.0 ml/min             |
| 4. 55.00 min   | 48%B at 0.7 ml/min             |
| 5. 90.00 min   | 100%B at 0.99 ml/min           |
| 6. 95.00 min   | 100%B at 1.2 ml/min            |
| 7. 101.00 min  | 100%B at 1.2 ml/min            |
| 8. 101.10 min  | 0%B at 1.2 ml/min              |
| 9. 103.00 min  | 0%B at 1.2 ml/min              |
| 10. 105.00 min | 0%B at 1.00 ml/min             |
| 11. 112.00 min | 0%B at 1.00 ml/min : end file  |

The mobile phase A consisted of 100% water modified with 60 mM PSA, 0.1% methanol, and 1 mg/L citric acid adjusted to pH 3.1 with acetic acid. Mobile phase B consisted of 80:10:10 MeOH: ACN: IPA modified with 40 mM lithium acetate and 2.0% acetic acid in 10 mg/L citric acid. 50  $\mu$ L of sample was injected per run and detection was performed on an ESA (ThermoFisher Scientific, Chelmsford, MA) LC-EC system with 16-channel coulometric array detector operated with potentials incremented in 60 mV steps (0–900 mV). All LC-EC system functions were controlled by CoulArray® software (CoulArray® for Windows® software version 3.10)

### **Fraction Analysis by LC-MS and LC-EC:**

For the LC-MS and LC-EC analysis, the POOL fractions were reconstituted in either 100 or 50  $\mu$ L of LC-MS mobile phase A (25 mM ammonium acetate in deionized water using a Millipore

water filtration system (Billerica, MA), adjusted to pH 3.1 using acetic acid) and separation was performed using two Shiseido C-18 columns (4.6 x 150 mm) connected in tandem and maintained at room temperature (or approximately 23<sup>0</sup> C, without control). The gradient was as follows:

- |                |                                |
|----------------|--------------------------------|
| 1. 1.00 min    | 0%B at 0.5 ml/min : start file |
| 2. 08.00 min   | 20%B at 0.5 ml/min             |
| 3. 20.00 min   | 55%B at 0.5 ml/min             |
| 4. 35.00 min   | 48%B at 0.5 ml/min             |
| 5. 55.00 min   | 95%B at 0.5 ml/min             |
| 6. 65.00 min   | 95%B at 0.6 ml/min             |
| 7. 70.00 min   | 95%B at 0.6 ml/min             |
| 8. 80.00 min   | 0%B at 0.6 ml/min              |
| 9. 85.00 min   | 0%B at 0.5 ml/min              |
| 10. 120.00 min | 0%B at 0.5 ml/min: end file    |

Supplementary Figure 1.

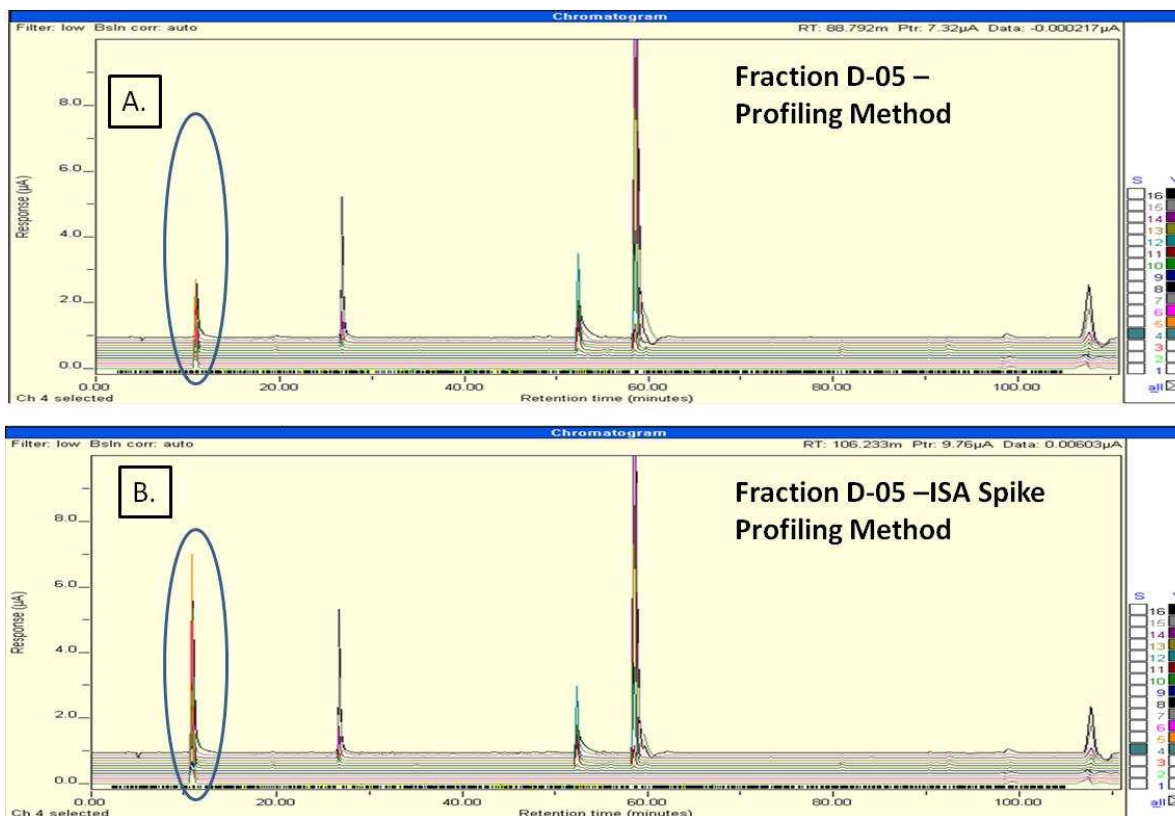

Supplementary Figure S1 Fraction D05 compared to the Fraction spiked with the ISA standard using LC-EC profiling. Panel A represents the fraction, D05, run using LC-EC profiling method with Panel B being the same fraction, spiked with the ISA internal standard. The circled peak is the ISA peak, which increases in height after the spike.

It should be noted that the ISA peak of interest, which is circled and increases in the spiked panel B chromatogram, has shifted in relation to the LC-EC chromatogram run using the LC-MS conditions (Figure 7, panel A). When run using the LC-MS conditions, ISA eluted at ~ 50.77 minutes, where as now it is coming out at 10.90 minutes. This change in retention is an aspect of the ion-pairing reagent used during fraction collection, TEA, being a cationic reagent which pairs strongly with the anion ISA compound. In the LC-EC profiling method, the ion-pairing reagent PSA, an anionic compound, is present at a high concentration in the mobile phase, displacing the ion-pair interaction, and preventing retention enhancement.
